# Supplementary material for: ID helix-loop-helix proteins as determinants of cell survival in B-cell chronic lymphocytic leukemia cells in vitro
Source: PubMed Central journal article supplement (PMC4320821; doi:10.1186/s12943-014-0286-9), 2015-02-03

### Delta area

A

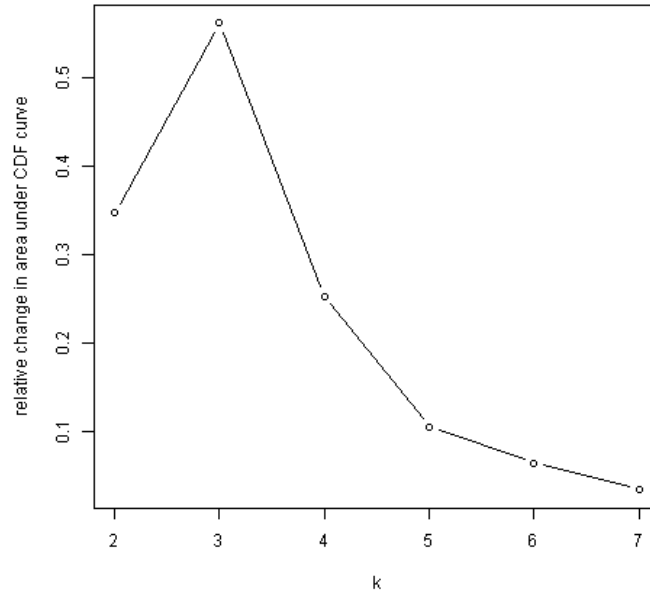

B

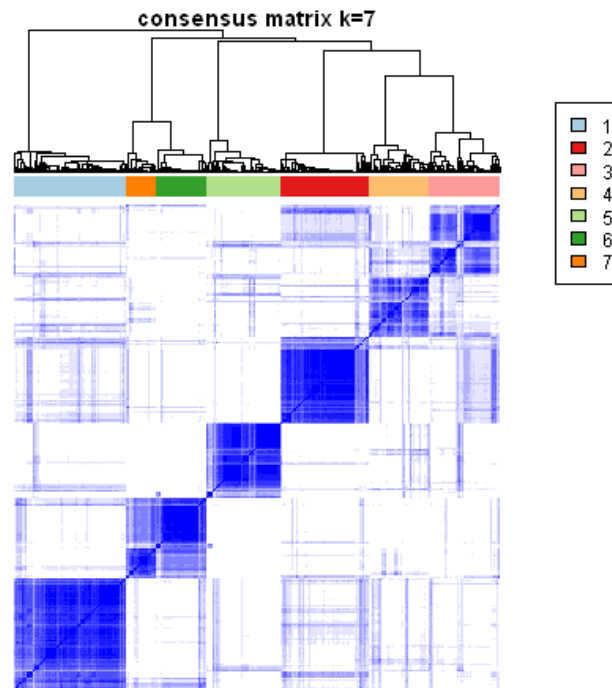

Supplement: 12943_2014_286_MOESM2_ESM.pdf [file 12943_2014_286_MOESM2_ESM.pdf]
