# Supplementary material for: ID helix-loop-helix proteins as determinants of cell survival in B-cell chronic lymphocytic leukemia cells in vitro
Source: PubMed Central journal article supplement (PMC4320821; doi:10.1186/s12943-014-0286-9), 2015-02-03

### CLL12 - PEITC

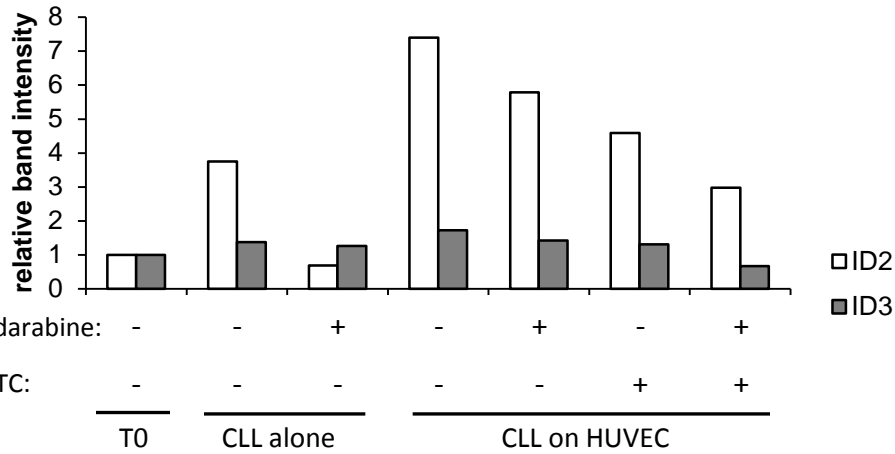

### CLL18 - PEITC

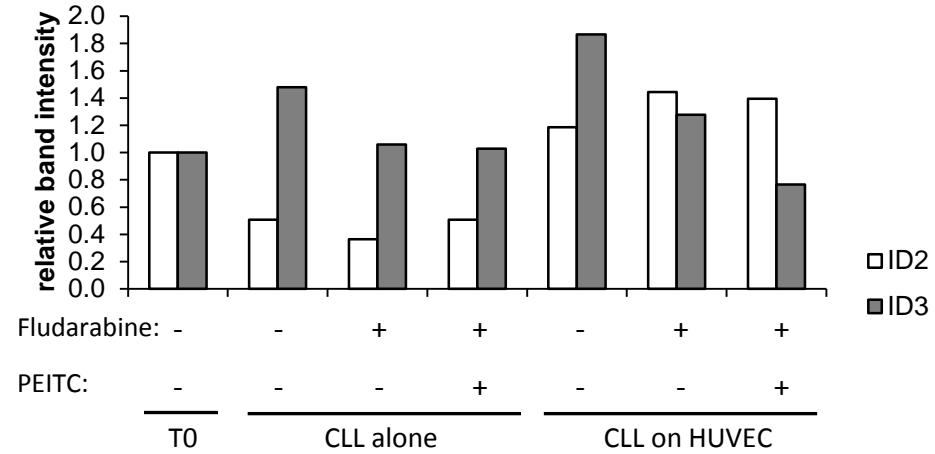

### CLL12 - GSH

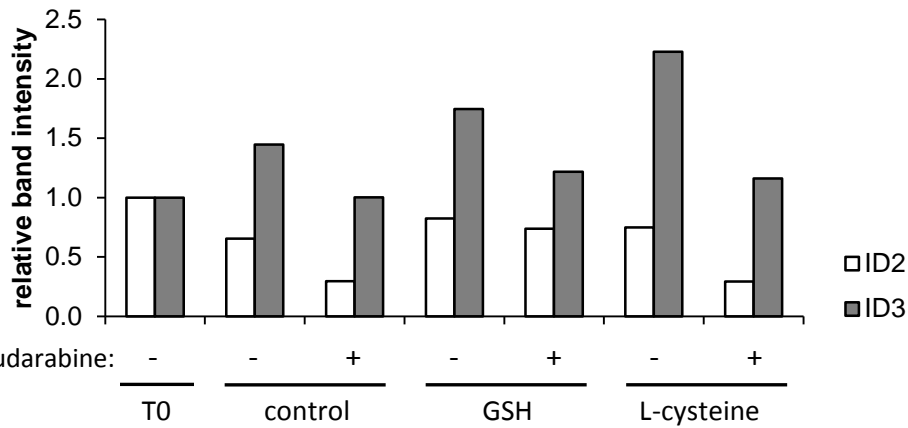

### CLL18 - GSH

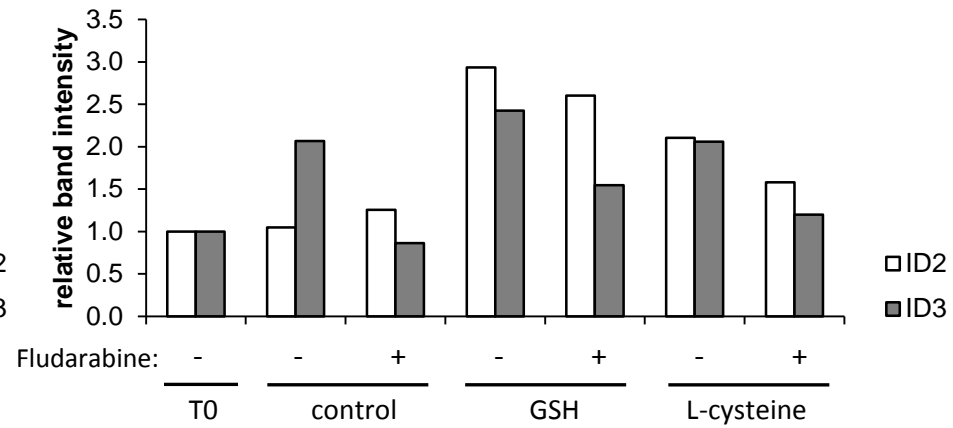

Supplement: 12943_2014_286_MOESM12_ESM.pdf [file 12943_2014_286_MOESM12_ESM.pdf]
